# Supplementary material for: Vancomycin continuous infusion in neonates: dosing optimisation and therapeutic drug monitoring
Source: HighWire-hosted journal article supplement (doi:10.1136/archdischild-2012-302765), 2012-12-19
Supplement: archdischild-2012-302765supp.pdf [file archdischild-2012-302765supp.pdf]

## Supplements

Table S1. Characteristics of variables in cost driver analyses

|                      | Number of patients diagnosed in 2007~2010 (%) | Tumour metastasis, % | CCI score, mean (SD) | Treatment in medical centre, % |
|----------------------|-----------------------------------------------|----------------------|----------------------|--------------------------------|
| <b>Cancer</b>        |                                               |                      |                      |                                |
| Colorectal cancer    | 48551 (43.0)                                  | 17.2                 | 3.7 (2.0)            | 51.5                           |
| Liver cancer         | 44965 (49.4)                                  | 13.5                 | 4.0 (1.7)            | 54.8                           |
| Female breast cancer | 38691 (43.8)                                  | 5.2                  | 3.0 (1.7)            | 54.4                           |
| Lung cancer          | 40533 (46.3)                                  | 56.6                 | 4.5 (2.2)            | 59.0                           |
| Oral cancer          | 23981 (47.2)                                  | 41.7                 | 3.3 (1.8)            | 65.9                           |
| Prostate cancer      | 15757 (44.9)                                  | 29.6                 | 3.3 (1.6)            | 55.7                           |
| Gastric cancer       | 15260 (49.8)                                  | 24.8                 | 4.0 (2.0)            | 53.6                           |
| Oesophageal cancer   | 8308 (45.7)                                   | 23.3                 | 4.2 (2.1)            | 58.8                           |
| Non-Hodgkin lymphoma | 7453 (45.8)                                   | 23.3 <sup>a</sup>    | 3.0 (1.4)            | 67.7                           |
| Leukaemia            | 6597 (46.2)                                   | N/A                  | 2.6 (1.1)            | 74.6                           |

SD, standard deviation

<sup>a</sup> Late stage (Ann Arbor stage 3~4) for non-Hodgkin lymphoma
